# Supplementary material for: Tetrathiomolybdate (TM)-associated copper depletion influences collagen remodeling and immune response in the pre-metastatic niche of breast cancer
Source: PubMed Central journal article supplement (PMC8382701; doi:10.1038/s41523-021-00313-w), 2021-08-23
Supplement: 41523_2021_313_MOESM1_ESM.pdf [file 41523_2021_313_MOESM1_ESM.pdf]

**Supplementary Files**

**Supplementary Table 1: TM Adverse Events**

| <b>Adverse Event</b>    |                     | <b>N (%)</b>      | <b>N (%)</b>     |
|-------------------------|---------------------|-------------------|------------------|
|                         |                     | <b>All Grades</b> | <b>Grade 3/4</b> |
| <b>Hematologic</b>      |                     |                   |                  |
|                         | Anemia              | 324 (10.8)        | 1 (0.03)         |
|                         | Neutropenia         | 418 (14.0)        | 58 (1.9)         |
|                         | Febrile Neutropenia | 1 (0.03)          | 1 (0.03)         |
|                         | Leukopenia          | 425 (14.2)        | 29 (1.0)         |
|                         | Thrombocytopenia    | 31 (1.0)          | 0 (0)            |
| <b>Gastrointestinal</b> |                     |                   |                  |
|                         | Sulfur Burps        | 849 (28.4)        | 0 (0)            |
|                         | Nausea              | 76 (2.5)          | 0 (0)            |
|                         | Vomiting            | 8 (0.3)           | 0 (0)            |
|                         | Diarrhea            | 46 (1.5)          | 0 (0)            |
|                         | Constipation        | 7 (0.2)           | 0 (0)            |
|                         | Abdominal Pain      | 1 (0.03)          | 0 (0)            |
| <b>General</b>          |                     |                   |                  |
|                         | Fatigue             | 729 (24.4)        | 6 (0.2)          |
| <b>Neurologic</b>       |                     |                   |                  |
|                         | Dizziness           | 25 (0.8)          | 0 (0)            |
|                         | Neuropathy          | 537 (17.9)        | 5 (0.2)          |

**Legend:** This table depicts adverse events related to TM using CTCAE v. 3.

**Supplementary Table 2: Biomarkers of Collagen Remodeling, Nordic Biosciences**

| #                      | Biomarker | Specification                                        | Description                        |
|------------------------|-----------|------------------------------------------------------|------------------------------------|
| <b>ECM Formation</b>   |           |                                                      |                                    |
| 1                      | PRO-C3    | Released N-terminal pro-peptide of type III collagen | Interstitial matrix formation      |
| <b>ECM Degradation</b> |           |                                                      |                                    |
| 2                      | C1M       | MMP degraded type I collagen                         | Interstitial matrix degradation    |
| 3                      | C4M       | MMP degraded type IV collagen                        | Basement membrane degradation      |
| 4                      | C6M       | MMP degraded type VI collagen                        | Interstitial matrix degradation    |
| 5                      | NIC       | Cathepsin S degraded nidogen-1                       | Basement membrane degradation      |
| 6                      | DCN-CS    | Cathepsin S degraded decorin                         | Proteoglycan degradation           |
| 7                      | VCANM     | MMP degraded versican                                | Proteoglycan degradation           |
| <b>Cross-Linking</b>   |           |                                                      |                                    |
| 8                      | LOX-L2    | Lysyl oxidase homolog 2                              | Crosslinking enzyme                |
| <b>Inflammation</b>    |           |                                                      |                                    |
| 9                      | VICM      | Citrullinated and MMP degraded vimentin              | Macrophage activity / inflammation |
| 10                     | CRPM      | MMP degraded C-reactive protein                      | Chronic inflammation               |

**Legend:** This table depicts the collagen biomarkers and their specifications.

**Supplementary Figure 1: Baseline Biomarkers of ECM degradation (C4M, DCN-CS, NIC and VCANM) and ECM inflammation (VICM and CRPM) in the exploratory cohort**

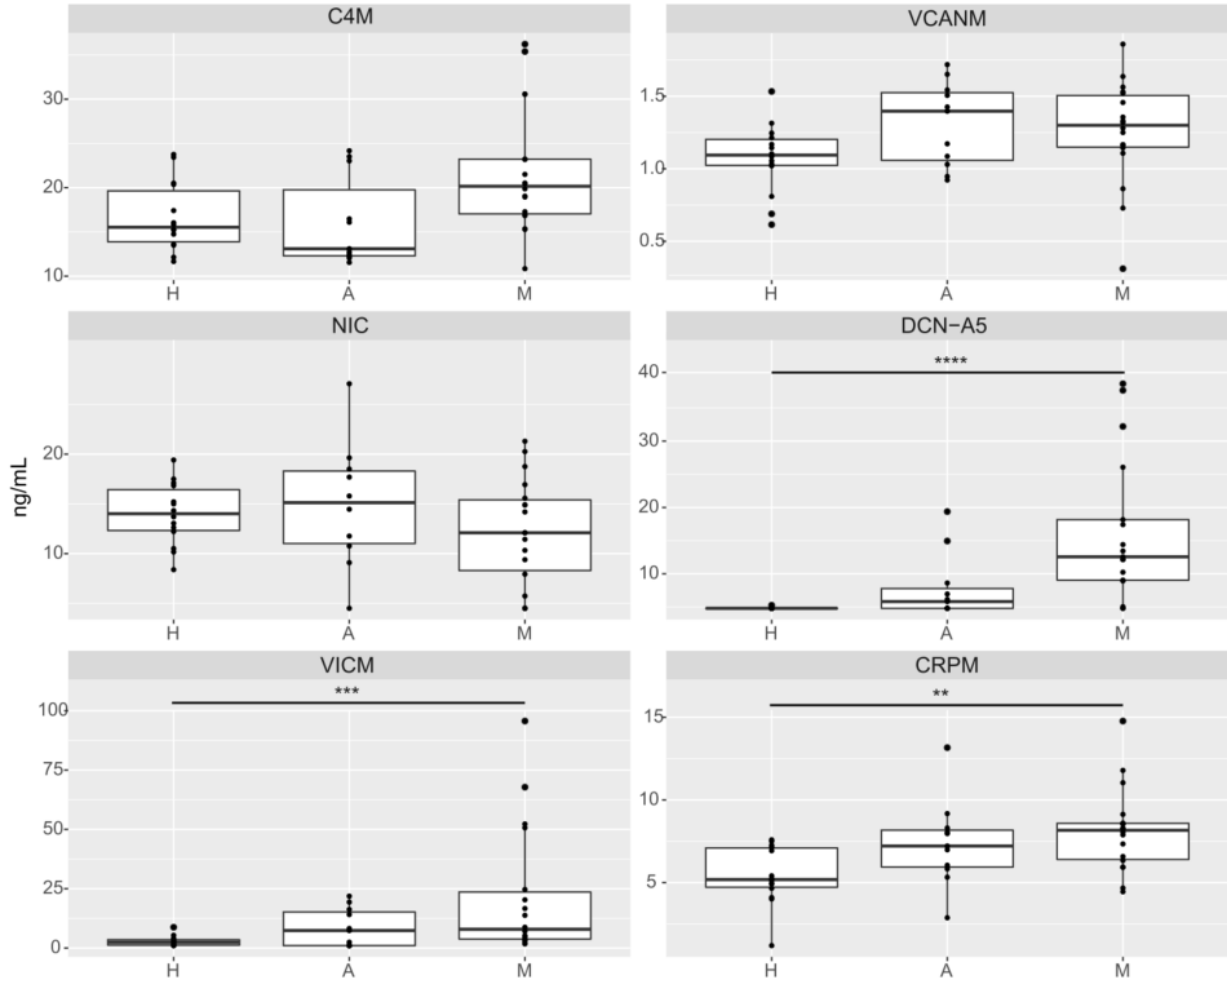

**Legend:** Tukey boxplots (lines representing 25<sup>th</sup>, 50<sup>th</sup>, and 75<sup>th</sup> percentile with whiskers representing lowest and highest values and \*representing outliers defined as 1.5x the 75<sup>th</sup> or 25<sup>th</sup> percentile respectively) depict levels of C4M, DCN-CS, NIC, VCANM, VICM, and CRPM (median and interquartile range) in those with metastatic (M) and adjuvant (A) disease compared with healthy controls (H). P-values: \* $<0.05$ , \*\* $<0.01$ , \*\*\* $<0.001$ , \*\*\*\* $<0.0001$

**Supplementary Figure 2: Spearman correlation of LOXL2 with C1M, PRO-C3 and C6M**

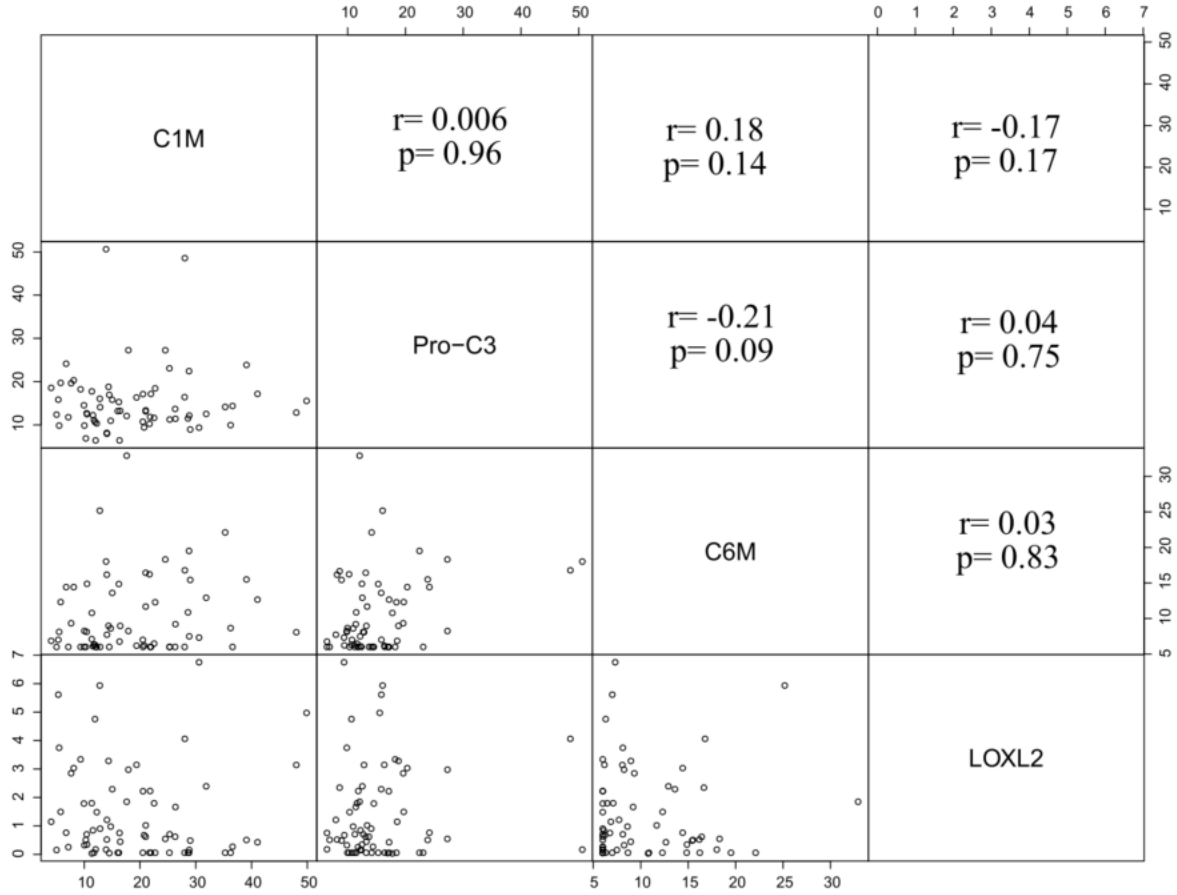

**Legend:** Figure depicts relationships of baseline collagen biomarkers with associated Spearman correlation coefficients and p-values.

**Supplementary Figure 3: Baseline levels of C1M and Pro-C3 in the TM study by Outcome and Stage**

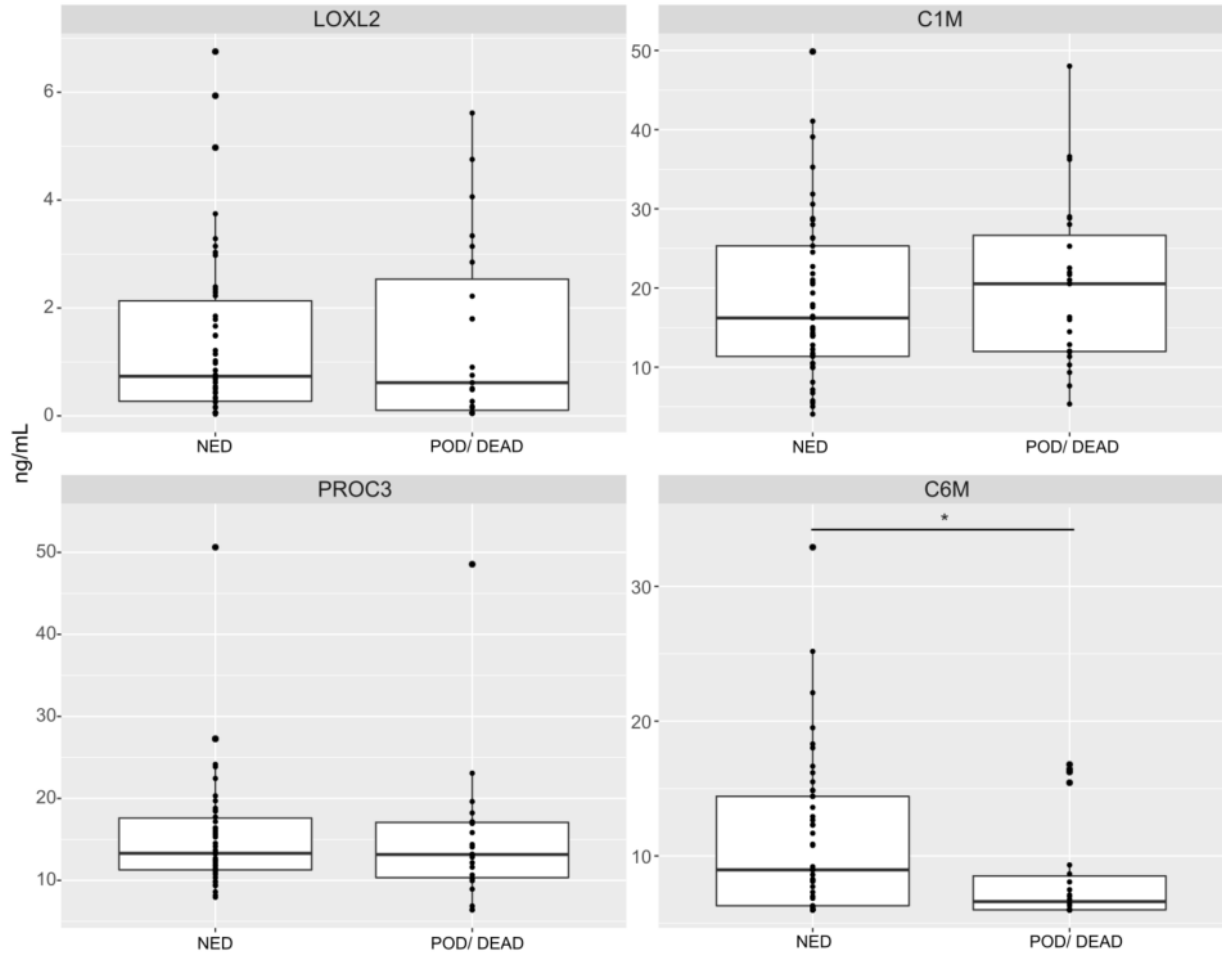

**Legend:** Tukey boxplots (lines representing 25<sup>th</sup>, 50<sup>th</sup>, and 75<sup>th</sup> percentile with whiskers representing lowest and highest values and \*representing outliers defined as 1.5x the 75<sup>th</sup> or 25<sup>th</sup> percentile respectively) of baseline C1M and Pro-C3 levels are depicted, stratified by those who experienced POD/death vs. those who were NED. P-values: \*<0.05, \*\*<0.01, \*\*\*<0.001, \*\*\*\*<0.0001

Supplementary Figure 4: Cytokine Analysis in Orthotopic Mouse Models of TNBC treated with TM

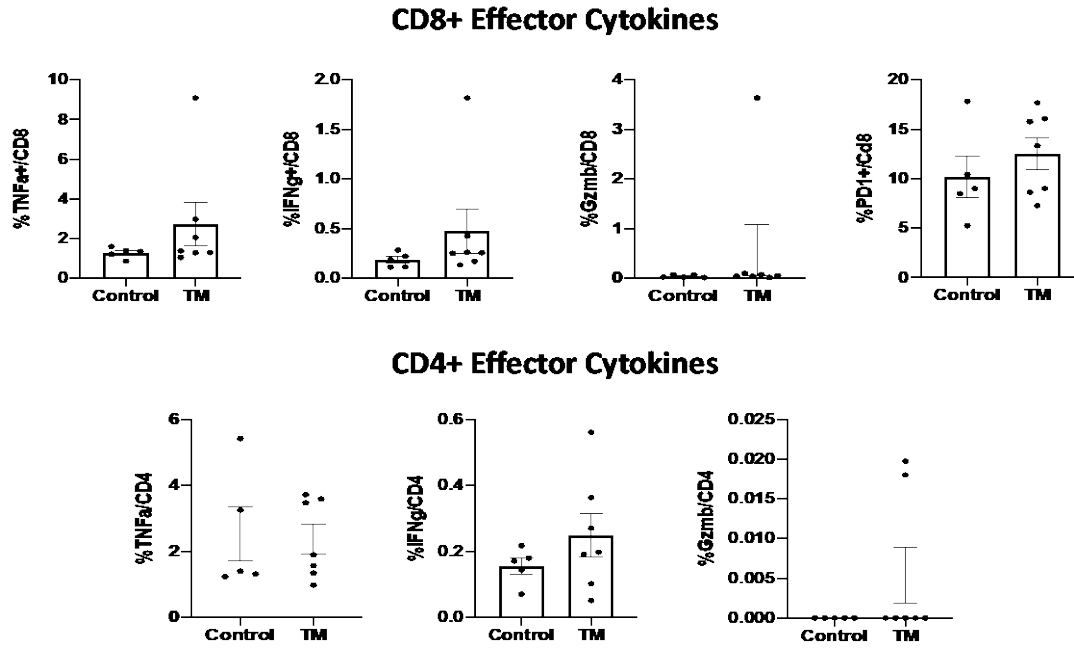

**Legend.** There was a trend towards higher IFN-g secretion from T cells in mice treated with TM compared with controls and a slightly higher PD-1 expression on CD8+ T cells in TM-treated mice versus controls. All error bars represent standard error of mean (SEM), and all experimnts were run in duplicate.

# Supplementary Figure 5: Gating Strategies for Flow Cytometry Analyses

## A. Representative Gating Strategy for Immune Cells

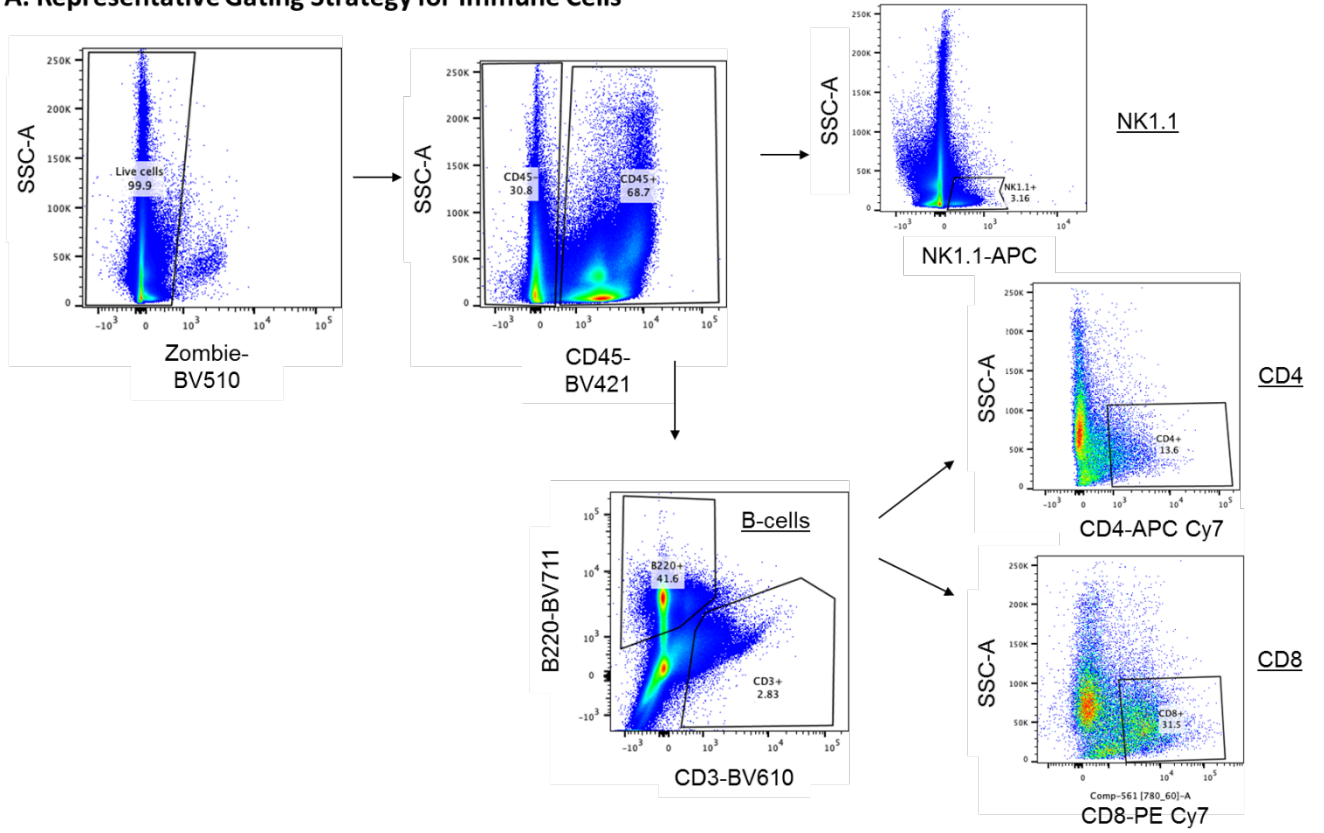

## B. Representative Gating Strategy for Cytokines and PD-1

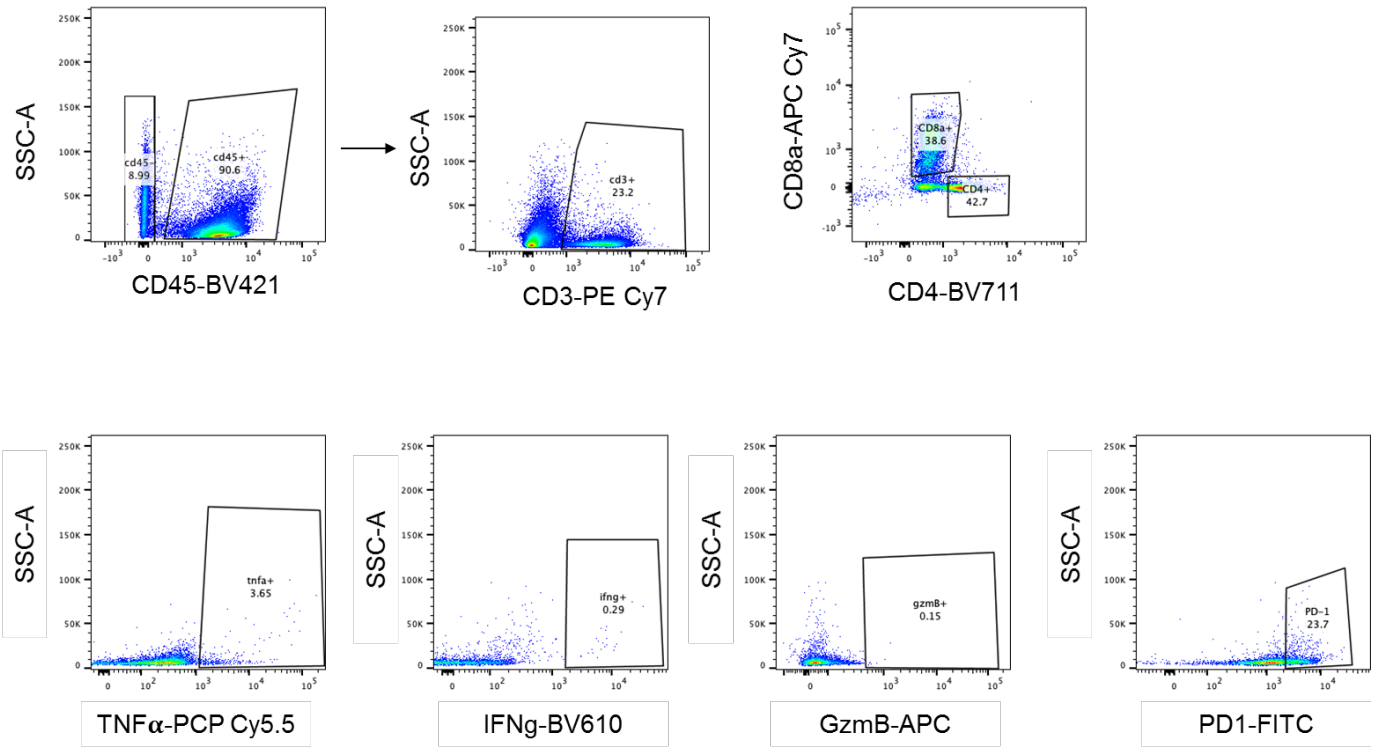



### C. Representative Gating Strategy for Myeloid Immune Cells

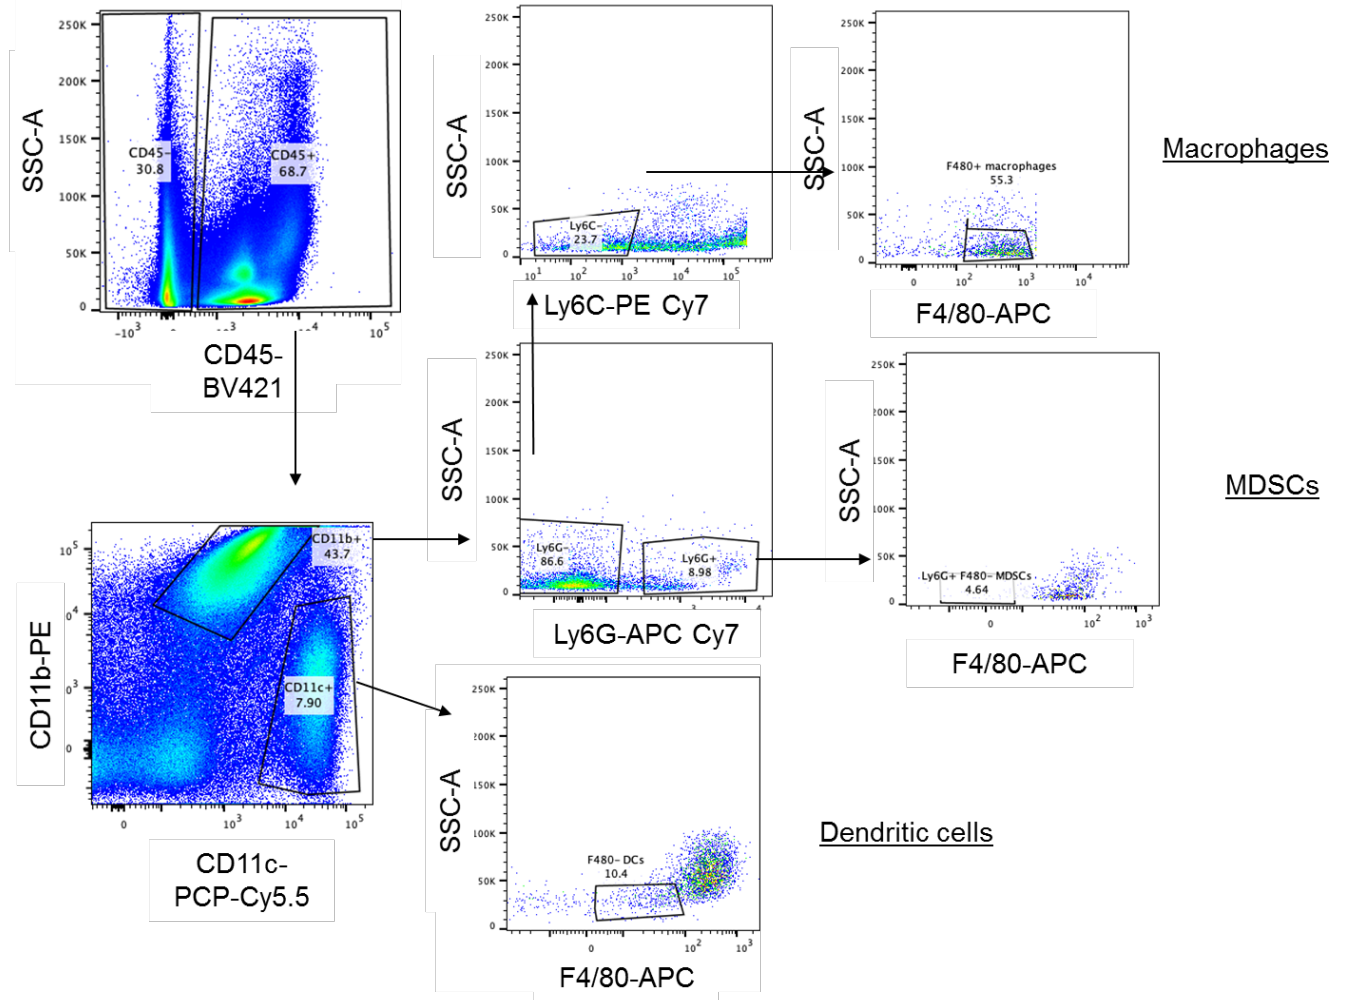

**Legend:** This figure depicts gating strategies for the various flow cytometry analyses. After gating the cells on SSC-A vs. FSC-A, single cells were selected on two separate parameters (FSC-H vs. FSC-W, followed by SSC-H vs. SSC-W), not shown here. The next step was to gate live cells using Zombie fixable dye, followed by CD45+, B220+, CD3+, CD4+ and CD8+ as shown (Panel A). Tumor cells were CD45-mCherry+. Gating for cytokines and PD-1 was performed for both CD4+ and CD8+ cells (Panel B). Representative gating strategy performed for myeloid cells (Panel C).
